# Supplementary material
Source: MDPI journal article supplement (https://www.mdpi.com/2673-6209/3/2/11)
Supplement: s1 [file s1]

## Supplementary Materials

**Table S1.** Abbreviations, commercial sources, and melting points of the common monomers used in this study.

| Common diamines                                                                                 | Source                        | Vacuum-drying condition | Melting point (°C) |
|-------------------------------------------------------------------------------------------------|-------------------------------|-------------------------|--------------------|
| 4,4'-Oxydianiline (4,4'-ODA)                                                                    | Tokyo Chemical Industry (TCI) | 50 °C/12h               | 191 <sup>a</sup>   |
| 2,2'-Bis(trifluoromethyl)benzidine (TFMB)                                                       | Wakayama Seika                | 50 °C/12 h              | 184 <sup>a</sup>   |
| 4,4'-Diaminobenzanilide (DABA)                                                                  | TCI                           | 50 °C/12 h              | 205 <sup>a</sup>   |
| 1,2,3,4-Cyclobutanetetracarboxylic dianhydride (CBDA)                                           | TCI                           | 200 °C / 12 h           | 285 <sup>b</sup>   |
| Bicyclo[2.2.2]oct-7-ene-2,3,5,6-tetracarboxylic dianhydride (BTA)                               | TCI                           | 150°C / 24 h            | ----               |
| 1 <i>S</i> ,2 <i>R</i> ,4 <i>S</i> ,5 <i>R</i> -Cyclohexanetetracarboxylic dianhydride (H-PMDA) | New Japan Chemical            | 150 °C / 24 h           | 303 <sup>a</sup>   |

<sup>a</sup> Data determined from the endothermic peak measured at a heating rate of 5 °C min<sup>-1</sup> on DSC.

<sup>b</sup> Data from the safety data sheet

**Table S2.** Abbreviations, commercial sources, and melting points of the raw materials used in this study.

| Raw materials                       | Source | Melting point (°C) <sup>a</sup> |
|-------------------------------------|--------|---------------------------------|
| Maleic anhydride (MAn)              | TCI    | 54                              |
| 1,2,4,5-Tetramethylbenzene (Durene) | TCI    | 80                              |
| <i>N</i> -Bromosuccinimide (NBS)    | TCI    | ----                            |
| 2,2'-Azobisisobutyronitrile (AIBN)  | TCI    | 103                             |
| 4-Nitrobenzoyl chloride (4-NBC)     | TCI    | 73                              |

<sup>a</sup> Data from the safety data sheet.

**Section S1.** Reaction schemes for the synthesis, detailed synthetic procedures, and the analytical results of OHADA-based diimide compound: *N*-phenyloctahydroanthracene-2,3,6,7-tetracarboxydiimide (Ph-OHADI).

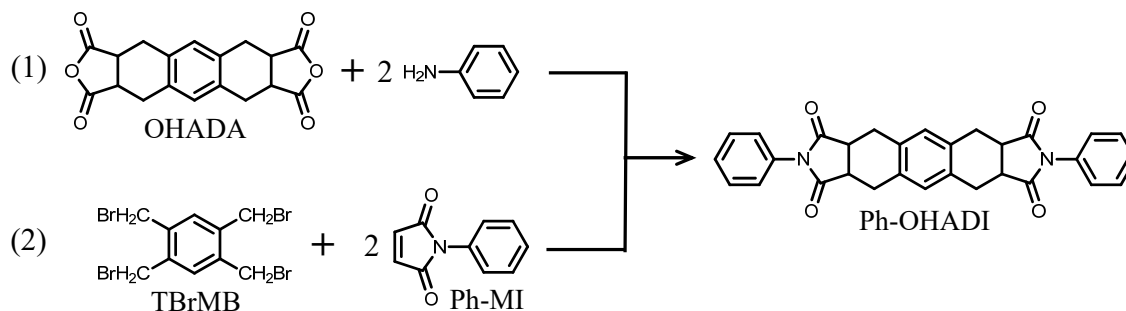

An OHADA-based diimide compound, *N*-phenyloctahydroanthracene-2,3,6,7-tetracarboxydiimide (Ph-OHADI) was synthesized via the following different routes (1 and 2), as described below.

**Route (1):** In a 100 mL-three-necked flask, OHADA (2 mmol, 0.656 g) and aniline (4.3 mmol, 0.397 g) were dissolved in dehydrated GBL (22 mL), and the reaction mixture was refluxed at 200 °C for 4 h in a nitrogen atmosphere. After the reaction, the reaction mixture was cooled to room temperature. The precipitate formed was collected by filtration, washed with adequate solvents, and dried at 120 °C for 12 h under vacuum. A light-brown product was obtained (yield: 47%). The analytical data of the product are as follows. <sup>1</sup>H-NMR (400 MHz, DMSO-*d*<sub>6</sub>, δ, ppm): 7.41–7.32[m, 6H (6.13H), 3,3',4,4',5,5'-protons of the terminal aniline unit (AN)], 7.01 [s, 2H (2.00H), the protons of the central aromatic units], 6.82 [d, 4H (4.00H), *J* = 8.0 Hz, 2,2',6,6'-protons of AN], 3.46 [st (not well-resolved), 4H (4.08H), CH–C=O], 3.01–2.91 [m, 8H (8.23H), Ar–CH<sub>2</sub>]. The data confirmed that the product is the desired model compound (Ph-OHADI).

**Route (2):** In a 100 mL-three-necked flask, TBrMB (5.4 mmol, 2.409 g) and *N*-phenylmaleimide (Ph-MI, 14.9 mmol, 2.593 g) were dissolved in anhydrous GBL (20 mL) in the presence of NaI (50 mmol, 7.47 g), and the reaction mixture was refluxed at 150 °C for 6 h in a nitrogen atmosphere. After the reaction, the reaction mixture was kept in a refrigerator. The precipitate formed was collected by filtration, washed with cold GBL and water, and dried at 160 °C for 12 h under vacuum. A light-brown product was obtained (yield: 19%). The crude product was recrystallized from GBL, and fine needle crystal was obtained (recrystallization yield: 73%). The analytical data of the product are as follows. Melting point (DSC): 418 °C. FT-IR (KBr plate method, cm<sup>-1</sup>): 3107/3065/3011 (C<sub>arom</sub>–H stretching), 2942/2902/2836 (C<sub>aliph</sub>–H), 1773/1700 (imide group, C=O), 1497 (phenyl group), 1388 (imide group, N–C<sub>arom</sub>), <sup>1</sup>H-NMR (400 MHz, DMSO-*d*<sub>6</sub>, δ, ppm): 7.41–7.32[m, 6H (6.06H), 3,3',4,4',5,5'-protons of AN], 7.01 [s, 2H (2.00H), the protons of the central aromatic units], 6.82 [d, 4H (4.01H), *J* = 7.8 Hz, 2,2',6,6'-protons of AN], 3.46 [st (not well-resolved), 4H (4.12H), CH–C=O], 3.02–2.91 [m, 8H (8.05H), Ar–CH<sub>2</sub>]. The results confirmed that the product is the desired model compound (Ph-OHADI).

**Section S2.** Reaction scheme for the synthesis, detailed synthetic procedures, and the analytical results of OHADA-based diimide compound: *N-n*-butyloctahydroanthracene-2,3,6,7-tetracarboxydiimide (Bu-OHADI).

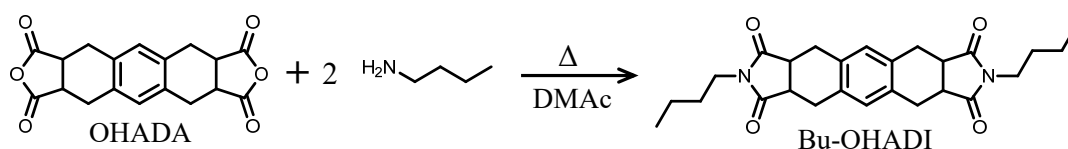

Another OHADA-based diimide compound, *N-n*-butyloctahydroanthracene-2,3,6,7-tetracarboxydiimide (Bu-OHADI) was synthesized, as described below. In a 100 mL-three-necked flask, OHADA (2 mmol, 0.657 g) and *n*-butylamine (5 mmol, 0.384 g) were dissolved in dehydrated DMAc (5 mL), and the reaction mixture was stirred at 1 h, then refluxed at 170 °C for 4 h in a nitrogen atmosphere. After the reaction, the reaction mixture was kept in a refrigerator for one day. However, no precipitation was formed. Then, the reaction mixture was gradually poured into a large quantity of water. The precipitation formed was collected by filtration, washed with a small quantity of methanol, and dried at 120 °C for 12 h under vacuum. A white product was obtained (yield: 77%). The analytical data of the product are as follows. FT-IR (KBr plate method,  $\text{cm}^{-1}$ ): 3020 ( $\text{C}_{\text{arom}}\text{-H}$  stretching), 2952/2887 ( $\text{C}_{\text{aliph}}\text{-H}$ ), 1775/1698 (imide group,  $\text{C=O}$ ).  $^1\text{H-NMR}$  (400 MHz,  $\text{DMSO-}d_6$ ,  $\delta$ , ppm): 6.86 [s, 2H (2.00H),  $\text{Ar-H}$ ], 3.29 [st (not well-resolved (close to the proton signal of water contained in the solvent), 4H,  $\text{CH-C=O}$ ], 3.13 [t, 4H (3.90H),  $J = 6.4$  Hz,  $\text{N-CH}_2$ ], 2.93 [d, 4H (3.86H),  $J = 14.4$  Hz,  $\text{Ar-CH}_a\text{H}_b$ ], 2.69 [d (br), 4H (3.30H),  $\text{Ar-CH}_a\text{H}_b$ ], 1.03 [sext (not well-resolved), 4H (4.33H),  $\text{N-CH}_2\text{-CH}_2\text{-CH}_2\text{-CH}_3$ ], 0.50 [t, 6H (5.99H),  $J = 7.2$  Hz,  $\text{N-CH}_2\text{-CH}_2\text{-CH}_2\text{-CH}_3$ ], 0.37 [quin (not well-resolved), 4H (3.42H),  $\text{N-CH}_2\text{-CH}_2\text{-CH}_2\text{-CH}_3$ ]. The results confirmed that the product is the desired model compound (Bu-OHADI). This model compound showed no optically anisotropic liquid-crystalline textures during both the heating and cooling processes on a polarizing optical microscope. Thus, the OHADA-based diimide unit did not behave as a mesogen, probably reflecting its distorted structure.

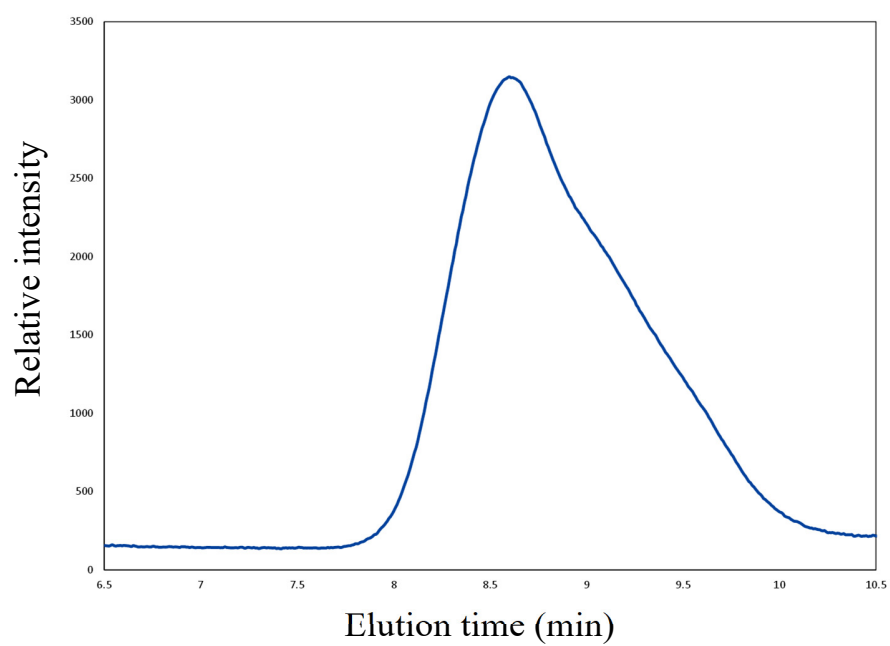

**Figure S1.** GPC curve of OHADA/TFMB polyimide obtained by the modified one-pot process.

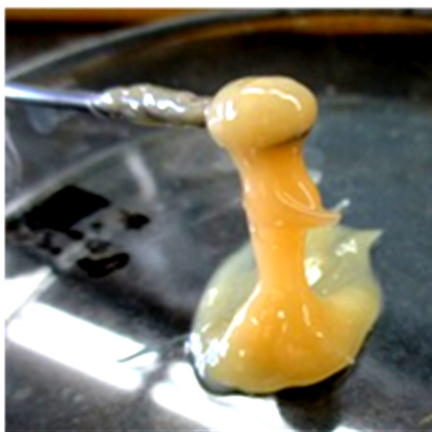

**Figure S2.** Appearance of the reaction mixture after the one-pot polycondensation process for the CBDA/TFMB system.
